1 **Prevalence of bovine tuberculosis and characterization of**  
2 **the members of the *Mycobacterium tuberculosis* complex**  
3 **from slaughtered cattle in Rwanda**

4 Jean B. Ntivuguruzwa<sup>1,2\*</sup>¶, Anita Michel<sup>1¶</sup>, Francis B. Kolo<sup>1&</sup>, Ivan E. Mwikarago<sup>3#a&</sup>, Jean C. S.  
5 Ngabonziza<sup>4,5&</sup>, Henriette VanHeerden<sup>1¶</sup>

6 <sup>1</sup>Bovine Tuberculosis and Brucellosis Research Programme, Department of Veterinary Tropical  
7 Diseases, Faculty of Veterinary Science, University of Pretoria; Pretoria, South Africa

8 <sup>2</sup>Department of Veterinary Medicine, College of Veterinary Medicine, University of Rwanda,  
9 Kigali, Rwanda

10 <sup>3</sup>Department of Human Medicine and Device assessment and Registration, Rwanda Food and  
11 Drug Administration, Kigali, Rwanda

12 <sup>4</sup>National Reference Laboratory Division, Department of Biomedical Services, Rwanda  
13 Biomedical Centre, Kigali, Rwanda

14 <sup>5</sup>Department of Clinical Biology, School of Medicine and Pharmacy, College of Medicine and  
15 Health Sciences, University of Rwanda, Kigali, Rwanda

16 <sup>#a</sup>Current address: Department of Human Medicine and Device assessment and Registration,  
17 Division of Human Medicine, Assessment and registration, Rwanda Food and Drug  
18 Administration, Kigali, Rwanda

19 \* Corresponding author

20 E-mail: [boscus2@gmail.com](mailto:boscus2@gmail.com)

21 ¶ These authors contributed equally to this work

22 & These authors also contributed equally to this work

## 23 **Abstract**

## 24 **Background**

25 Bovine tuberculosis (bTB) is an endemic disease in Rwanda, but little is known about its  
26 prevalence and causative mycobacterial species. The disease causes tremendous losses in  
27 livestock and wildlife and remains a significant threat to public health.

## 28 **Materials and methods**

29 A cross-sectional study employing a systematic random sampling of cattle (n=300) with the  
30 collection of retropharyngeal lymph nodes and tonsils (n=300) irrespective of granulomatous  
31 lesions was carried out in six abattoirs to investigate the prevalence and identify mycobacterial  
32 species using culture, acid-fast bacteria staining, polymerase chain reaction, and GeneXpert  
33 assay. Individual risk factors and the origin of samples were analysed for association with the  
34 prevalence.

## 35 **Findings**

36 Of the 300 samples, six were collected with visible TB-like lesions. Our findings demonstrated the  
37 presence of *Mycobacterium tuberculosis* complex (MTBC) in 1.7% (5/300) of sampled slaughtered  
38 cattle. *M. bovis* was isolated from 1.3% (4/300) animals while one case was caused by a rifampicin-  
39 resistance (RR) *M. tuberculosis*. Non-tuberculous mycobacteria were identified in 12.0% (36/300)

40 of the sampled cattle. There were no significant associations between the prevalence and abattoir  
41 category, age, sex, and breeds of slaughtered cattle.

## 42 **Conclusions**

43 This study is the first in Rwanda to isolate both *M. bovis* and RR *M. tuberculosis* in slaughtered  
44 cattle indicating that bTB is prevalent in Rwanda with a low prevalence. The isolation of RR *M.*  
45 *tuberculosis* from cattle indicates possible zoonothroponotic transmission of *M. tuberculosis* and  
46 close human-cattle contact. To protect humans against occupational zoonotic diseases, it is  
47 essential to control bTB in cattle and raise the awareness among all occupational groups as well  
48 as reinforce biosafety at the farm level and in the abattoirs.

## 49 **Author's summary**

50 Tuberculosis in cattle (bTB) causes financial losses to livestock owners and is a disease  
51 transmissible to humans especially those with an occupational risk through exposure to infected  
52 animals and animal products. This study aimed to identify the prevalence of bTB and characterize  
53 the mycobacterial species from cattle slaughtered in the six abattoirs in Rwanda. Four *M. bovis*,  
54 as well as one rifampicin-resistant (RR) *M. tuberculosis*, were identified from slaughtered cattle  
55 and, thus, the apparent bTB prevalence was 1.7% (5/300). Likely, the RR *M. tuberculosis* isolate  
56 was mostly likely of human origin and transmitted to cattle during close human-cattle contact. It  
57 is therefore essential to control bTB in cattle and reinforce the protection of farmworkers and  
58 abattoir workers who are always exposed to infected animals.

## 59 Introduction

60           Apart from *Mycobacterium leprae*, the genus *Mycobacterium* comprises two groups,  
61 *Mycobacterium tuberculosis* complex (MTBC) and non-tuberculous mycobacteria (NTM) also  
62 known as atypical mycobacteria or mycobacteria other than tuberculosis (MOTT) (1). The bovine  
63 tuberculosis (bTB) is a mycobacterial disease of cattle, other domestic and wild animals, as well  
64 as humans (2-5). The disease is characterized by granulomatous lesions in affected tissues (2, 4,  
65 6). The disease is primarily caused by *Mycobacterium bovis* (7), and occasionally by *M. caprae* (8-  
66 10). *Mycobacterium tuberculosis* infection in cattle has been identified more recently from African  
67 countries and is of concern (4, 11-13). These species belong to the MTBC whose members share  
68 99.9% of their genome (14).

69           In Rwanda, only two studies are available on bTB prevalence including one that reported  
70 0.5% prevalence in slaughtered cattle at société des abattoirs de Nyabugogo (SABAN  
71 Nyabugogo) (15). This study also found that the disease was associated with financial losses  
72 related to the condemnation of carcasses which negatively affected the livelihood of small  
73 Rwandan farmers (15). Another study was a retrospective recording TB-like macroscopic lesions  
74 at the same abattoir from 2006 to 2010 and reported the prevalence ranging from 1.4% in Kigali  
75 city to 11.8% in Eastern Province (16). In Rwanda, the veterinary services lack the capacity and  
76 facility to isolate airborne pathogens. Thus, the control program for bTB relies mostly on monthly  
77 reports of gross TB-like lesions from the main private abattoir, SABAN Nyabugogo.

78           The cattle population in Rwanda was estimated at 1,293,768 in 2018 (17). Although  
79 informal slaughtering of goats, sheep, chicken, and rabbits for family or small bar consumption  
80 does occur in Rwanda, it is estimated that 95.0% of slaughtered cattle are processed by abattoirs.  
81 Determining the bTB prevalence and identification of MTBC members is essential to understand  
82 the transmission dynamics at the animal-human interface and to design adequate control  
83 programs. The objective of this study was therefore to determine the prevalence of bTB and  
84 characterize MTBC members in slaughtered cattle in Rwanda. The findings of this study will  
85 contribute to building the bTB database essential for policymakers to establish informed control  
86 policies and strategies to mitigate bTB in Rwanda.

## 87 **Materials and methods**

### 88 **Study area**

89           The present study was carried out in six abattoirs in Rwanda. Rwanda is a member of the  
90 East African Community (EAC) located in the southern hemisphere, near the equator. Six  
91 abattoirs that consented to participate in this study included high throughput abattoirs (n=4)  
92 slaughtering more than 50 cattle daily, and low throughput abattoirs (n=2), slaughtering 50 or  
93 less every day. Three of these abattoirs slaughtered cattle and goats and three specialised in cattle.  
94 The location of the six abattoirs is shown in Fig 1.

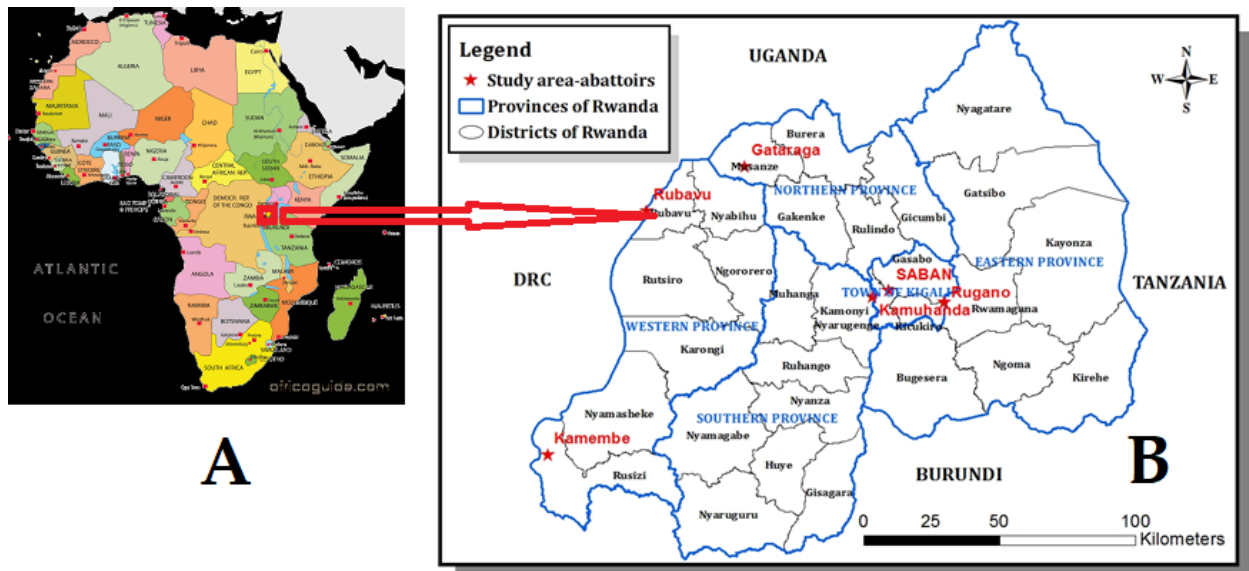

95

96 **Fig 1: Maps of (A) Africa with a red rectangle indicating the location of Rwanda (B) Rwanda**  
97 **with provinces and districts and red stars show the locations of abattoirs visited in this study.**

## 98 **Study design and sample size**

99 A cross-sectional study was carried out from August 2018 through October 2019 to  
100 determine the prevalence of bTB and characterize *Mycobacterium* spp. in cattle slaughtered at  
101 abattoirs. The abattoirs that accepted to participate in the study were purposively selected based  
102 on their strategic locations in the thirty districts of Rwanda (Fig 1) and their slaughtering capacity.  
103 High throughput abattoirs received cattle from different districts. For instance, cattle that were  
104 sampled at SABAN abattoir located in Kigali City were from 19 districts including Nyarugenge,  
105 and Gasabo (Kigali City), Ngoma, Kirehe, Nyagatare, Gatsibo, Bugesera, and Kayonza (Eastern  
106 Province), Gakenke, Burera, Rulindo, and Gicumbi (Northern Province), Rutsiro, Karongi,  
107 Ngororero (Western Province), Ruhango, Nyanza, Kamonyi, and Muhanga (Southern Province).  
108 Cattle that were sampled at Rugano abattoir located in Kigali City were from four districts

109 including Gasabo, Kicukiro, Nyarugenge (Kigali City), and Rwamagana of Eastern Province.  
110 Cattle that were sampled at Kamembe abattoir located in the Western Province, were from eight  
111 districts including Gisagara, Huye, Nyaruguru, Ruhango, Nyanza, Nyamagabe (Southern  
112 Province), Nyamasheke, and Rusizi (Western Province). Cattle that were sampled at Rubavu  
113 abattoir located in the Western Province, were from two districts including Nyabihu, and Rubavu  
114 (Western Province).

115 The sample size was calculated as previously described (18).

$$116 \quad N = \frac{Z^2 P(1 - P)}{d^2}$$

117 Where N is the sample size, a 95% confidence level (z) equivalent to 1.96; P is an expected of 0.5%  
118 based on a previous study in cattle in Rwanda (15), and the absolute precision (d = P/2) of 0.25%.  
119 According to the formula, the total sample size was supposed to be 291 but it was rounded to 300  
120 cattle to include and respect the systematic sampling of 10 cattle per each of the 30 districts of  
121 Rwanda.

## 122 **Sampling procedure and tissue collection**

123 A systematic random sampling procedure among dairy cattle was adopted, and the  
124 strategy was to sample five animals from the same district per day. The movement permit was  
125 collected on arrival to record the origin of the animals. The age was determined using dentition  
126 as previously described (19). Animals of two years and above were selected with a preference on  
127 dairy except for some low throughput abattoirs that slaughtered mostly young male cattle.

128 Animals were aligned in a crush pen and every fourth animal was selected, individual  
129 demographic information (district of origin, age, breed, and sex) recorded, restrained, marked on  
130 the head with original paint, and released for resting waiting for slaughter. Upon decapitation,  
131 the marked head was inspected, and medial and lateral retropharyngeal lymph nodes and lingual  
132 and palatine tonsils were aseptically collected into the same sterile 50 ml tube and stored at -20°C  
133 until processing.

## 134 **Culture and detection of acid-fast bacilli (AFB)**

135 Retropharyngeal lymph nodes and tonsils from each sampled animal (n=300) were  
136 decontaminated as previously described (20). Briefly, tissues were thawed, sliced, grounded in a  
137 sterile mortar with sea sand (Glentham Life Sciences, UK). An aliquot of each tissue sample was  
138 kept at -20°C. Another aliquot was divided into two 50 ml falcon tubes. The content of one tube  
139 was decontaminated by adding an equal volume of 2% hydrochloric acid and the other one with  
140 an equal volume of 4% sodium hydroxide for 10 min at room temperature, then centrifuged at  
141 3500 rpm for 10 min. The pellet was neutralized with 25 ml of sterile water centrifuged at 3500  
142 rpm for 10 min (20). Löwenstein-Jensen (LJ) medium was prepared according to the  
143 manufacturer's guidelines (Becton Dinkson, Franklin lakes, USA). Briefly, 37.3 g of LJ medium  
144 were completely dissolved in 600 ml of distilled water containing 12 ml of glycerol by heating.  
145 The dissolved LJ solution was then autoclaved at 121°C for 15 min. The homogenised sterile egg  
146 content (1000 ml) was added to the cooled LJ solution, then, 7 ml of the mixture was distributed  
147 into 14 ml – tubes (slopes) which were immediately inspissated at 85°C for 45 min. The slopes  
148 were checked for sterility and stored in the fridge until use. Glycerol was replaced by 4g of



149 sodium pyruvate (Labkem, Spain) for the preparation of LJ with pyruvate. The pellet that was  
150 decontaminated by hydrochloric acid and sodium hydroxide were each inoculated onto duplicate  
151 slopes of LJ with glycerol and duplicate slopes of LJ with sodium pyruvate, and then incubated  
152 at 37°C for 10 weeks with weekly readings. Cultures were scored positive, negative, or  
153 contaminated. When contamination occurred, the original sample was reprocessed and  
154 reinoculated. Any suspected growth was tested for morphology using auramine O staining and  
155 fluorescence microscope as previously described (21). All manipulations of samples including  
156 processing, inoculation, and DNA extraction were performed in the biosafety level three at  
157 National Reference Laboratory (NRL), Kigali, Rwanda.

## 158 **Molecular Assays**

### 159 **DNA extraction**

160 Lysate DNA was extracted from each AFB culture isolate as previously described (22).  
161 Briefly, two loopful bacterial cells were suspended in 300 µl of distilled sterile water, then boiled  
162 at 95°C for 25 min, quickly cooled, and stored at - 20°C until required. Genomic DNA was also  
163 extracted from inactivated grown cultures using a DNA extraction kit according to the  
164 manufacturer's instructions (Promega, USA).

### 165 **Conventional PCR**

166 Isolates that were confirmed AFB were screened for the presence of 16S rRNA sequence  
167 specific for the genus *Mycobacterium* and a sequence encoding the MPB 70 antigen which is

168 specific for members of MTBC using specific primers (Mycgen-F and Mycgen-R, TB1-F and TB2-  
169 F, respectively) as previously described (23). PCR assay based on genomic deletions  
170 differentiated members of MTBC (refer to as MTBC differential PCR assay) using primers  
171 targeting the regions of difference, RD1, RD4, RD9, and RD12 as previously described (Table 1)  
172 (Warren et al. 2006). *Mycobacterium tuberculosis* 25177 was used as a reference. For all multiplex  
173 PCRs, the 15 µl PCR reaction mixture contained 1x MyTaq™ Red PCR Mix (Bioline, South Africa),  
174 0.2 µM primers, and 2 µl of template DNA. The PCR cycling condition was as follows: initial  
175 denaturation at 94°C for 5 min followed by 25 cycles of denaturation at 94°C for 30 sec, annealing  
176 at 62°C for 1 min, and extension at 72°C for 1 min and a final extension step at 72°C for 8 min.  
177 Primers amplified 1030 bp, 372 bp, 108 bp, and 268 bp fragments for the genus, MTBC, and *M.*  
178 *bovis*, respectively, and were analysed by electrophoresis using a 2% agarose gel stained with red  
179 gel nucleic acid stain and visualized under UV light. The PCR experiments were performed at  
180 Rwanda Agriculture and Animal Resources Board, Department of Veterinary Services in the  
181 Virology and Molecular Biology sections.

## 182 **GeneXpert/MTB/RIF assay**

183 MTBC isolates characterized by conventional PCR were also tested by  
184 GeneXpert/MTB/RIF molecular diagnostic assay following the manufacturer's instructions  
185 (Cepheid, Sunnyvale, USA). GeneXpert/MTB/RIF is a real-time PCR for the detection of MTBC  
186 and rifampin resistance. Briefly, 0.5 ml of the cell suspension was transferred into a conical-  
187 screwed tube and 1 ml of sample reagent was added. The mixture was vortexed for 10 sec and  
188 incubated for 15 min with vortexing for 10 sec after 8 min of incubation. The liquefied sample

189 was then dispensed into the sample chamber of the cartridge containing five probes (A-E),  
 190 integrated reagents tubes, a sample processing control, and a probe check control. Cartridges  
 191 were then installed into the GeneXpert<sup>RDx</sup> system version 4.8 (Cepheid, Sunnyvale, USA) and  
 192 the amplification was run for two hours by activating the software installed in the computer. This  
 193 assay was performed at NRL, Kigali, Rwanda.

194 Table 1. Oligonucleotides used to identify *Mycobacterium* species isolated from slaughtered cattle  
 195 in Rwanda

| PCRs                 | Primer name | Nucleotide sequence (5'-----3') | Target  | Size (bp) | Tm (°C) | References |              |
|----------------------|-------------|---------------------------------|---------|-----------|---------|------------|--------------|
| <b>Multi plex 1</b>  | MYCGEN-F    | AGA GTT TGA TCC TGG CTC AG      | 16s     | 1030      | 62      | (23)       |              |
|                      | MYCGEN-R    | TGC ACA CAG GCC ACA AGG GA      | rRNA    |           |         |            |              |
|                      | TB1-F       | GAA CAA TCC GGA GTT GAC AA      | MPB 70  | 372       |         |            |              |
|                      | TB2-R       | AGC ACG CTG TCA ATC ATG TA      |         |           |         |            |              |
| <b>Multi plex 2*</b> | RD1-1       | AAGCGGTTGCCGCCGACCGACC          |         | 146       | 62      | (24)       |              |
|                      | RD1-2       | CTGGCTATATTCCTGGGCCCGG          |         |           |         |            |              |
|                      | RD1-3       | GAGGCGATCTGGCGGTTTGGGG          |         |           |         |            |              |
|                      | RD4-1       | ATG TGC GAG CTG AGC GAT G       | Rv 1510 | 268       | 62      | (25)       |              |
|                      | RD4-2       | TGT ACT ATG CTG ACC CAT GCG     |         |           |         |            | RD is absent |
|                      | RD4-3       | AAA GGA GCA CCA TCG TCC AC      |         |           |         |            |              |
|                      | RD9-1       | CAA GTT GCC GTT TCG AGC C       | Rv 2073 | 108       | 62      | (24)       |              |
|                      | RD9-2       | CAA TGT TTG TTG CGC TGC         |         |           |         |            | RD is absent |
|                      | RD9-3       | GCT ACC CTC GAC CAA GTG TT      |         |           |         |            |              |
|                      | RD12-1      | GGGAGCCCAGCATTTACCTC            |         | 306       |         | (25)       |              |
|                      | RD12-2      | GTGTTGCGGGAATTACTCGG            |         |           |         |            |              |
|                      | RD12-3      | AGCAGGAGCGGTTGGATATTC           |         |           |         |            |              |

196 MPB 70 stands for protein from *M. bovis* with 0.70 mobility by native polyacrylamide gel  
197 electrophoresis at pH 9.4 gel but it is an antigen common to all MTBC, \*MTBC (*Mycobacterium*  
198 *tuberculosis* complex) differential PCR assay and Rv refers to rough morphology and virulent  
199 MTBC strain.

## 200 **Data analysis**

201 Data were recorded in the Microsoft Excel spreadsheet and descriptive and inferential  
202 statistics were performed using EpiInfo software version 7.2. The significance level of 95% and  
203 p-value less or equal to 5% were considered for all analyses. The prevalence of isolation of  
204 *Mycobacterium* and MTBC was tested for association with individual animal characteristics such  
205 as age, sex, breed, and sampled abattoir in the univariate logistic analysis using Chi-square or  
206 Fischer exact.

## 207 **Ethical clearance**

208 The authorization to conduct the study was obtained from the research screening and  
209 ethical clearance committee of the College of Agriculture, Animal Sciences and Veterinary  
210 Medicine, University of Rwanda (Ref:026/DRIPGS/2017), institutional review board of the  
211 College of Medicine and Health Sciences, University of Rwanda (N° 006/CMHS IRB/2020), and  
212 Animal Ethics Committee of the Faculty of Veterinary Science, University of Pretoria, South  
213 Africa (V004/2020). Informed verbal consents were obtained from district officials, managers of  
214 abattoirs, and owners of animals at the abattoirs.

## 215 Results

216 Out of the 300 sample sets collected from 300 cattle, 94.0% (282/300) were collected from  
217 the high throughput abattoirs while 6.0% (18/300) were from the low throughput abattoirs. Of the  
218 300 samples, 95.3% (286, 95% CI: 92.3 – 97.4) were collected from female cattle while 4.7% (14,  
219 95%CI: 2.6 -7.7) were from male cattle. The majority of 90.3% (271/300, 95% CI: 86.4 – 93.4) were  
220 from adult (3 years and above) cattle while 9.7% (29/300, 95% CI: 6.6 - 13.6) were collected from  
221 young animals. Most samples, 67.9% (203/300, 95% CI: 62.3 – 73.2) were collected from  
222 crossbreeds, 25.8% (77/300, 95%CI: 20.9 – 31.1) were collected from local breed “Ankole”, while  
223 6.7% (20/300, 95%CI: 3.8 – 9.5) were collected from a pure breed “Friesian”.

224 Of the 300 samples, six were collected with visible TB-like lesions including three samples  
225 with enlargement of all lymph nodes and one sample with granulomatous lesions in lungs. Other  
226 two samples had a mucoid pus in the popliteal lymph nodes. Of the 300 sample sets that were  
227 inoculated, 55.0% (165, 95% CI: 49.2 – 60.7) had bacterial growth of which 30.9% (51/165, 95% CI:  
228 23.9 – 40.0) were AFB as indicated by the auramine fluorescence staining method. Of the 51 AFB,  
229 the PCR identified 80.4% (41/51, 95% CI: 69.5 – 91.3) as *Mycobacterium* spp. (amplification of 1030  
230 bp fragment, Table 1). Of the 41 *Mycobacterium* spp., 87.8% (36/41, 95%CI: 77.8-97.8) were NTM,  
231 while the remaining 12.2% (5/41, 95% CI: 2.2 – 22.2) were MTBC (amplification of a 372 bp  
232 fragment, Table 1). MTBC differential PCR assay identified 80.0% (4/5, 95% CI: 44.9 – 100.0) as *M.*  
233 *bovis* (amplification of 108 bp, 146 bp, and 268 bp) and 20.0% (1/5, 95% CI: 0.0 – 55.1) as *M.*  
234 *tuberculosis* (amplification of 146 bp, 172 bp, 235 bp, 369 bp) (Fig 2). Overall, NTM were identified  
235 in 12.0% (36/300, 95%CI: 8.3-15.7) of the sampled cattle, MTBC were isolated in 1.7% (5/300) of the

236 sampled cattle and among these, four were *M. bovis*, while one was *M. tuberculosis*. The GeneXpert  
237 MTBC/RIF assay confirmed MTBC isolates. Resistance to rifampicin (RR) was detected in one  
238 isolate, but such RR was not confirmed by GeneXpert testing of the original sample due to very  
239 low bacterial load.

240 Among the six samples that were collected with visible TB-like lesions, only one was  
241 confirmed as *M. bovis*, another one was NTM, while the remaining four were not identified as  
242 *Mycobacterium* spp.

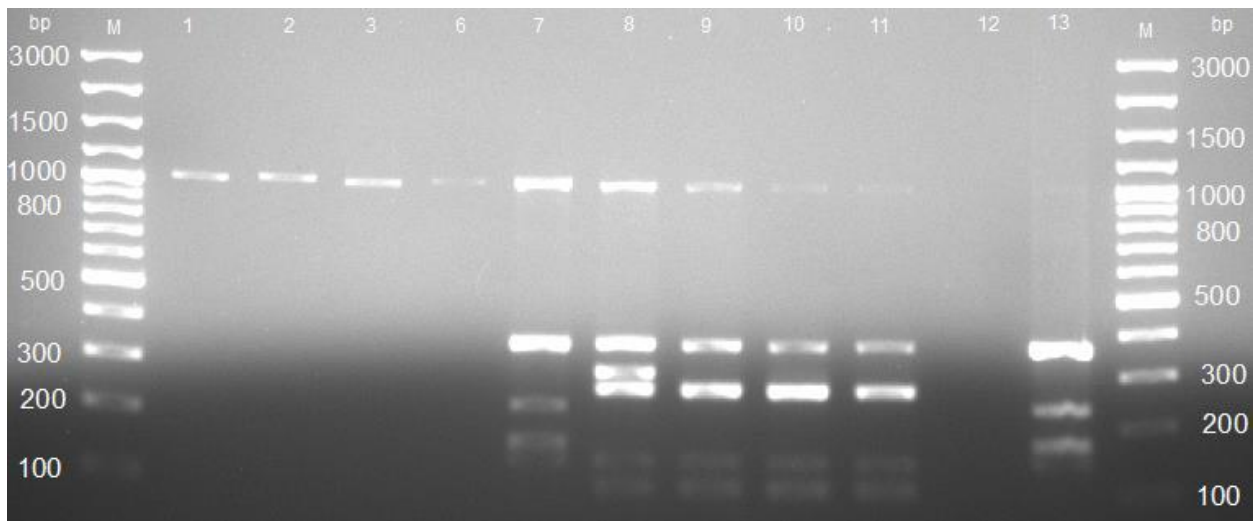

243  
244 **Fig 2. Agarose gel electrophoresis of the *Mycobacterium tuberculosis* complex differential PCR**  
245 **assay. Lane M: GeneRuler 100 bp (Invitrogen, ThermoFischer Scientific, South Africa), lanes**  
246 **2-4: Non-tuberculosis mycobacteria (NTM) which amplified 1030 bp; lane 7: *M. tuberculosis***  
247 **which amplified 1030 bp, 372 bp, 235 bp, 172 bp, and 146 bp; lanes 8 – 10: *M. bovis* which**  
248 **amplified 1030 bp, 372 bp, 268 bp, 146 bp, and 108 bp; lane 11: negative control; lane 12: *M.***  
249 ***tuberculosis* reference strain 2517.**

250 *Mycobacterium* spp. isolates were found in 83.3% (5/6) of the abattoirs; 80.9% (38/47) in  
251 high throughput abattoirs and 75.0 (3/4) in low throughput abattoirs, although the difference was  
252 not significant (Table 2). All the MTBC isolates were found in the high throughput abattoirs.  
253 MTBC were isolated in cattle from Nyarugenge district (n=1) of Kigali city, Karongi (n=1),  
254 Nyabihu (n=1), and Rubavu (n=2) districts of the Western Province. All five MTBC isolates were  
255 identified from adult and crossbred cattle (Table 2).

Table 2. Mycobacterial culture results for 300 slaughtered cattle and PCR results of AFB isolates stratified by the abattoir, age, breed, and sex of slaughtered cattle in Rwanda

| Variables | Categories      | Mycobacterial culture and AFB results |                      | PCR results of AFB isolates for detection of <i>Mycobacterium</i> spp. |           |                  |         | PCR results of AFB isolates for detection of <i>Mycobacterium tuberculosis</i> complex (MTBC) |            |                  |         |
|-----------|-----------------|---------------------------------------|----------------------|------------------------------------------------------------------------|-----------|------------------|---------|-----------------------------------------------------------------------------------------------|------------|------------------|---------|
|           |                 | Growth % (n)                          | AFB positive         | Positive % (n)                                                         | 95% CI    | Chi <sup>2</sup> | p-value | Positive n (%)                                                                                | 95% CI     | Chi <sup>2</sup> | p-value |
| Abattoirs | High throughput | 53.9 (152/282)                        | 16.7 (47/282)        | 80.9 (38/47)                                                           | 0.3 - 4.8 | 0.80             | 1.0     | 10.6 (5/47)                                                                                   | 0.0 - 16.3 | 0.00             | 1.00    |
|           | Low throughput  | 72.2 (13/18)                          | 22.2 (4/18)          | 75.0 (3/4)                                                             |           |                  |         | 0.0 (0/4)                                                                                     |            |                  |         |
|           | <b>Total</b>    | <b>55.0 (165/300)</b>                 | <b>17.0 (51/300)</b> | <b>80.4 (41/51)</b>                                                    |           |                  |         | <b>9.8 (5/51)</b>                                                                             |            |                  |         |
| Provinces | East            | 55.7 (39/70)                          | 17.1 (12/70)         | 83.3 (10/12)                                                           | -         | 1.60             | 0.9     | 0.0 (0/12)                                                                                    | -          | 10.20            | 0.04    |
|           | West            | 62.7 (44/70)                          | 25.7 (18/70)         | 72.2 (13/18)                                                           |           |                  |         | 22.2 (4/18)                                                                                   |            |                  |         |
|           | North           | 56.0 (28/50)                          | 16.0 (8/50)          | 87.5 (7/8)                                                             |           |                  |         | 0.0 (0/8)                                                                                     |            |                  |         |
|           | South           | 45.0 (36/80)                          | 13.8 (11/80)         | 81.8 (9/11)                                                            |           |                  |         | 0.0 (0/11)                                                                                    |            |                  |         |
|           | Kigali city     | 60.0 (18/30)                          | 6.7 (2/30)           | 100.0 (2/2)                                                            |           |                  |         | 50.0 (1/2)                                                                                    |            |                  |         |
|           | <b>Total</b>    | <b>55.0 (165/300)</b>                 | <b>17.0 (51/300)</b> | <b>80.4 (41/51)</b>                                                    |           |                  |         | <b>9.8 (5/51)</b>                                                                             |            |                  |         |
| Age       | Young           | 65.5 (19/29)                          | 20.7 (6/29)          | 50.0 (3/6)                                                             | 0.2-1.7   | 2.10             | 0.1     | 0.0 (0/6)                                                                                     | 0.0-9.3    | 0.02             | 1.00    |
|           | Adult           | 53.8 (146/271)                        | 16.6 (45/271)        | 84.4 (38/45)                                                           |           |                  |         | 11.1 (5/45)                                                                                   |            |                  |         |
|           | <b>Total</b>    | <b>55.0 (165/300)</b>                 | <b>17.0 (51/300)</b> | <b>80.4 (41/51)</b>                                                    |           |                  |         | <b>9.8 (5/51)</b>                                                                             |            |                  |         |
| Sex       | Female          | 55.6 (159/286)                        | 16.8 (48/286)        | 79.2 (38/48)                                                           | -         | 0.01             | 1.0     | 8.3 (4/48)                                                                                    | 0.4 - 74.8 | 0.20             | 0.30    |
|           | Male            | 42.9 (6/14)                           | 21.4 (3/14)          | 100.0 (3/3)                                                            |           |                  |         | 33.3 (1/3)                                                                                    |            |                  |         |
|           | <b>Total</b>    | <b>55.0 (165/300)</b>                 | <b>17.0 (51/300)</b> | <b>80.4 (41/51)</b>                                                    |           |                  |         | <b>9.8 (5/51)</b>                                                                             |            |                  |         |
| Breeds    | Ankole          | 54.5 (42/47)                          | 13.0 (10/77)         | 80.0 (8/10)                                                            | -         | 0.80             | 1.0     | 0.0 (0/10)                                                                                    | -          | 1.90             | 0.70    |
|           | Crossbred       | 56.2 (114/208)                        | 18.7 (38/203)        | 79.0 (30/38)                                                           |           |                  |         | 13.2 (5/38)                                                                                   |            |                  |         |
|           | Friesians       | 42.1 (8/19)                           | 15.0 (3/20)          | 100.0 (3/3)                                                            |           |                  |         | 0.0 (0/3)                                                                                     |            |                  |         |
|           | <b>Total</b>    | <b>55.0 (165/300)</b>                 | <b>17.0 (51/300)</b> | <b>80.4 (41/51)</b>                                                    |           |                  |         | <b>9.8 (5/51)</b>                                                                             |            |                  |         |



## 242 Discussion

243 Bovine tuberculosis (bTB) causes financial losses in livestock and remains a significant  
244 threat to public health worldwide (26, 27). This study aimed to determine the prevalence of bTB  
245 and identify *Mycobacterium* species in slaughtered cattle using bacterial culture and PCR assay.  
246 This study identified for the first time in Rwanda *M. bovis* (n=4) and *M. tuberculosis* (n=1), as well  
247 as non-tuberculous mycobacteria (n=36) in a total of 300 cattle from 30 districts slaughtered in six  
248 abattoirs. Although the prevalence of bTB (1.7%, 5/300) was low, the identification of *M. bovis* and  
249 *M. tuberculosis* with rifampicin resistance in cattle indicates the cross-transmission from humans  
250 to cattle but also highlights the great risk of exposure of handlers of live infected cattle and animal  
251 carcasses.

252 Considering the moderate sample size (n=300) and the random selection of animals found  
253 without visible lesions (96.7%), the prevalence observed for MTBC in this study (1.7%) is higher  
254 than 0.5% reported at SABAN Nyabugogo abattoir, Rwanda (15) given the small sample size  
255 (n=36) selected on gross bTB-like lesions. However, considering that samples were collected at a  
256 single point in time and the small sample size (n=10) per district, the prevalence in this study is  
257 likely to be lower than the true prevalence in slaughtered cattle in Rwanda. The prevalence (1.7%)  
258 obtained in this study is consistent with 2.1% obtained in Kenya using bovine TB-like lesions,  
259 AFB staining, bacterial culture, and PCR (28) but lower compared to 7.6% obtained in Uganda  
260 using bovine TB-like lesions, bacterial culture, AFB staining, and capillia TB-neo assay for  
261 detection of MPT 64 antigens of the MTBC (29). The prevalence obtained in this study also falls  
262 in the range of bTB herd prevalence (0.2 to 13.2%) reported in cattle in Tanzania (30). These

263 findings confirm that bTB is prevalent in cattle of the East African region and the disease remains  
264 a transboundary disease through animal trading and animal movement across porous borders  
265 (31).

266 This study demonstrated that bTB is most probably endemic in Rwandan cattle but at low  
267 prevalence since samples were collected from cattle slaughtered in the six abattoirs of which four  
268 high throughput abattoirs received cattle from several districts including those from more than  
269 90 km. As mentioned in materials and method section, only ten samples were collected from each  
270 of the 30 districts but the animals at the sampled abattoir originated from different districts. Three  
271 animals that were positive to MTBC were detected in cattle from Rubavu (n=2) and Nyabihu (n=1)  
272 districts which supply cattle to the nearby Rubavu abattoir (less than 20 km) in the Western  
273 Province. Of the other two cattle that were positive to MTBC, one was from the Ngororero district  
274 of the Western Province and another one from Nyarugenge district of Kigali city, and both were  
275 found at SABAN abattoir located in Kigali city. We, therefore, recommend a longitudinal study  
276 considering a good sample size per district.

277 This study identified for the first time *M. bovis* (1.3%, 4/300) and *M. tuberculosis* (0.3%,  
278 1/300) in slaughtered cattle in Rwanda. Similar studies in Africa isolated *M. bovis* (2.0%, 19/929)  
279 and *M. tuberculosis* (0.2%, 2/929) in slaughtered cattle in Kenya (28), and *M. bovis* (4.0%, 12/300)  
280 and *M. tuberculosis* (0.7%, 2/300) in slaughtered cattle in Cameroon (32). However, the prevalence  
281 of *M. tuberculosis* in cattle is commonly below 1.0% (28, 32, 33), apart from some areas (27.0%) in  
282 Ethiopia where cattle owners had the habit of chewing tobacco into the mouth of their cattle (34).  
283 The prevalence of *M. tuberculosis* is also high in areas with a high prevalence of TB in humans

284 owning cattle (35). For example, a study in the Eastern Cape province, South Africa, identified  
285 more *M. tuberculosis* (41.8%, 157/376) than *M. bovis* (1.3%, 5/376) from slaughtered cattle (36). *M.*  
286 *tuberculosis* (n=1) that was isolated in this study was resistant to Rifampicin which is a cornerstone  
287 antibiotic of the first-line regimen (37). Resistance to rifampicin (RR) is considered multidrug  
288 resistance tuberculosis (MDR-TB) (38) and has been reported in Rwandans with TB (39)  
289 suggesting that RR *M. tuberculosis* was of human origin. The transmission of RR *M. tuberculosis*  
290 from humans to cattle was not surprising since 92.0% of Rwandans owning cattle are small dairy  
291 farmers practicing a zero-grazing system (40) which may promote close animal-human contact  
292 with the risk of cross-infection from humans to cattle and vice-versa (41). Cattle can be considered  
293 sentinels for *M. tuberculosis* in settings where TB is not effectively controlled in humans. It is  
294 therefore also an alert for improved TB control in humans in rural settings. Despite the little  
295 attention given to the zoonotic TB caused by *M. bovis* (42), several studies have isolated *M. bovis*  
296 in extrapulmonary lymph nodes of humans in neighbouring Uganda (43), and Tanzania (44). It  
297 is hence essential to raise awareness among veterinary and human health professionals about the  
298 zoonanthroponotic and anthrozoönotic transmission of TB in Rwanda. Further studies on the  
299 identification of *M. bovis* in occupational groups are worth investigating in Rwanda to provide  
300 epidemiological data that are indispensable for the eradication of tuberculosis by 2035 (45).

301         This study identified NTM in 12.0% of slaughtered cattle, and this prevalence is consistent  
302 with 8.4% obtained in Uganda (29) but higher than 3.9% in Tanzania (46). This study considered  
303 the presence of NTM in the environment, hence, tissues were aseptically (changing gloves and  
304 sterilization of the knife into hot water) collected, stored, and processed, thus, it can be assumed

305 that the identified NTM were recovered from the tissues of animals, but it does not prove any  
306 pathological effect, it merely demonstrates colonization. Since these NTM were not speciated, it  
307 would be important to determine their potential significance for the health of the cattle. NTM  
308 have been isolated in cattle and sometimes cause localized lymphadenitis, skin infections, TB-like  
309 pulmonary infections, and systemic diseases in immunodeficient cattle (47). The presence of NTM  
310 in cattle may interfere with immune-diagnostic methods such as comparative tuberculin test and  
311 may negatively impact vaccination (48).

312 In this study, among the samples with tuberculosis-like lesions (n=6), only one popliteal  
313 lymph node was associated with NTM species, and one lung was associated with *M. bovis*.  
314 However, a retrospective study reported the prevalence of 11.8% based on TB-like lesions  
315 recorded during routine meat inspection from 2006 to 2010 at SABAN Nyabugogo abattoir,  
316 Rwanda (16). TB-like lesions might therefore be a poor reflection of bTB in the absence of a  
317 confirmatory laboratory test. TB-like lesions from routine meat inspection should, therefore, be  
318 confirmed by laboratory tests to obtain accurate results essential for surveillance of bTB, but also  
319 improve the knowledge of inspectors.

320 *Mycobacterium* spp. isolates were more frequently isolated in adult (76.7%) than in young  
321 cattle (40.0%) and all MTBC were isolated from adult cattle consistent with a study in Ethiopia  
322 (49). The isolation of *M. bovis* depends a lot on the dose and frequency of exposure, therefore,  
323 higher infection rates in adult cattle result from a cumulative risk of infection. In other words, the  
324 older an animal the more opportunities it had to contract *M. bovis*. Furthermore, the literature

325 states that young cattle are less susceptible to mycobacteria owing to the high concentration of T  
326 cells in the blood circulation and T cells play a role in the immunity against mycobacteria (50).

## 327 **Conclusions**

328 This study demonstrated that bTB is prevalent in Rwanda at low prevalence. The present  
329 study reports for the first time MTBC in cattle in Rwanda and the presence of RR *M. tuberculosis*  
330 indicating possible cross-infection between humans and cattle. There is therefore a need for  
331 raising awareness among veterinary and human health professionals about the zoonanthropotic  
332 transmission and cross infection of TB in Rwanda. Further studies on the identification of *M. bovis*  
333 in humans are worth investigating to provide epidemiological data that are indispensable for the  
334 eradication of tuberculosis by 2035, a global movement led by the World Health Organization.

## 335 **Author's contributions**

336 Conceptualization, JBN, AM, and HvH; methodology, JBN, AM, and HvH; Formal analysis JBN;  
337 Investigation and data collection, JBN; Writing—original draft preparation, JBN; writing—review  
338 and editing, JBN, IEM, JCSN, FBK, AM and HvH; Supervision, HvH, AM, and FBK; Project  
339 administration, HvH; Resources, IEM, JCSN, HvH; Funding acquisition, HvH. All authors have  
340 read and approved the manuscript.

## 341 **Funding**

342 This research was funded by the Institute of Tropical Medicine Antwerp, Belgium through a grant  
343 agreement with the Department of Veterinary Tropical Diseases, University of Pretoria, grant  
344 number ITM FA4.

## 345 **Acknowledgments**

346 The authors would like to acknowledge the National Reference Laboratory Division and the  
347 University of Rwanda for the facilitation of the study. We thank also district veterinary officers  
348 of the sampled abattoirs, abattoir managers, and abattoirs workers for good cooperation.

## 349 **Conflict of interest**

350 The authors declare that there are no conflicts of interest. The funders had no role in the design  
351 of the study; in the collection, analyses, or interpretation of data, in the writing of the manuscript,  
352 or in the decision to publish the results.

## 353 **References**

354

- 355 1. Pfyffer GE, Auckenthaler R, Van Embden J, van Soolingen D. *Mycobacterium canettii*, the  
356 smooth variant of *M. tuberculosis*, isolated from a Swiss patient exposed in Africa. *Emerging*  
357 *infectious diseases*. 1998;4(4):631.
- 358 2. Michel AL, Müller B, van Helden PD. *Mycobacterium bovis* at the animal–human interface:  
359 A problem, or not? *Veterinary Microbiology*. 2010;140(3):371-81.
- 360 3. Michel AL, van Helden PD. Tuberculosis in African wildlife. *Tuberculosis in animals: An*  
361 *African perspective*: Springer; 2019. p. 57-72.
- 362 4. OIE. *Bovine tuberculosis Manual of Diagnostic Tests and Vaccines for Terrestrial Animals*  
363 2021: World Organization for Animal Health; 2021. p. 1058 - 74.
- 364 5. Thoen CO, Steele JH, Kaneene JB. *Zoonotic tuberculosis: Mycobacterium bovis and other*  
365 *pathogenic mycobacteria*: John Wiley & Sons; 2014.

- 366 6. Thoen CO, LoBue PA, Enarson DA, Kaneene JB, de Kantor IN. Tuberculosis: a re-  
367 emerging disease in animals and humans. *Veterinaria Italiana*. 2009;45(1):135-81.
- 368 7. Karlson AGL, Erwin F. *Mycobacterium bovis* nom. nov. *International journal of*  
369 *systematic and evolutionary microbiology*. 1970;20(3):273-82.
- 370 8. Ghielmetti G, Scherrer S, Friedel U, Frei D, Suter D, Perler L, et al. Epidemiological tracing  
371 of bovine tuberculosis in Switzerland, multilocus variable number of tandem repeat analysis of  
372 *Mycobacterium bovis* and *Mycobacterium caprae*. *PLoS One*. 2017;12(2):e0172474.
- 373 9. Pavlik I, Yayo Ayele W, Parmova I, Melicharek I, Hanzlikova M, Kormendy B, et al.  
374 Incidence of bovine tuberculosis in cattle in seven Central European countries during the years  
375 1990-1999. *VETERINARNI MEDICINA-PRAHA*. 2002;47(2/3):45-51.
- 376 10. Prodinge WM, Brandstätter A, Naumann L, Pacciarini M, Kubica T, Boschioli ML, et al.  
377 Characterization of *Mycobacterium caprae* isolates from Europe by mycobacterial interspersed  
378 repetitive unit genotyping. *Journal of Clinical Microbiology*. 2005;43(10):4984-92.
- 379 11. Ameni G, Tadesse K, Hailu E, Deresse Y, Medhin G, Aseffa A, et al. Transmission of  
380 *Mycobacterium tuberculosis* between farmers and cattle in central Ethiopia. *PLoS One*.  
381 2013;8(10):e76891.
- 382 12. Anne NS, Ronald B, Kumar TS, Kannan P, Thangavelu A. Molecular identification of  
383 *Mycobacterium tuberculosis* in cattle. *Veterinary microbiology*. 2017;198:81-7.
- 384 13. Malama S, Johansen TB, Muma JB, Mwanza S, Djonne B, Godfroid J. Isolation and  
385 molecular characterization of *Mycobacterium bovis* from Kafue lechwe (*Kobus leche kafuensis*) from  
386 Zambia. *Tropical animal health and production*. 2014;46(1):153-7.
- 387 14. Brosch R, Gordon SV, Marmiesse M, Brodin P, Buchrieser C, Eiglmeier K, et al. A new  
388 evolutionary scenario for the *Mycobacterium tuberculosis* complex. *Proceedings of the national*  
389 *academy of Sciences*. 2002;99(6):3684-9.
- 390 15. Habarugira G, Rukelibuga J, Nanyingi MO, Mushonga B. Bovine tuberculosis in Rwanda:  
391 Prevalence and economic impact evaluation by meat inspection at Société des Abattoirs de  
392 Nyabugogo-Nyabugogo Abattoir, Kigali. *Journal of the South African Veterinary Association*.  
393 2014;85(1).
- 394 16. Nshimiyimana J, Nahayo A, Mukamisha P. Prevalence Study on Bovine Tuberculosis in  
395 Rwanda from 2006 to 2010. *Rwanda Journal of Social and Applied Sciences* 2013;43.
- 396 17. Minagri MoAaAR. Annual Report 2018 - 2019 Kigali, Rwanda MINAGRI; 2019 November  
397 2019.
- 398 18. Dohoo IR, Martin SW, Stryhn H. *Veterinary epidemiologic research*. Charlotte, P.E.I.:  
399 VER, Inc.; 2009.
- 400 19. Pope GW. Determining the age of farm animals by their teeth: US Department of  
401 Agriculture; 1934.
- 402 20. Alexander KA, Pleydell E, Williams MC, Lane EP, Nyange JFC, Michel AL. *Mycobacterium*  
403 *tuberculosis*: an emerging disease of free-ranging wildlife. *Emerging infectious diseases*.  
404 2002;8(6):598-601.
- 405 21. Clancey J, Allen B, Rogers D, Smith L, Aber V, Mitchison D. Comparison of machine and  
406 manual staining of direct smears for acid-fast bacilli by fluorescence microscopy. *Journal of*  
407 *clinical pathology*. 1976;29(10):931-3.



- 408 22. Hlokwe TM, van Helden P, Michel A. Evaluation of the discriminatory power of variable  
409 number of tandem repeat typing of *Mycobacterium bovis* isolates from southern Africa.  
410 *Transboundary and emerging diseases*. 2013;60 Suppl 1:111-20.
- 411 23. Wilton S, Cousins D. Detection and identification of multiple mycobacterial pathogens by  
412 DNA amplification in a single tube. *Genome Research*. 1992;1(4):269-73.
- 413 24. Parsons LM, Brosch R, Cole ST, Somoskövi Á, Loder A, Bretzel G, et al. Rapid and simple  
414 approach for identification of *Mycobacterium tuberculosis* complex isolates by PCR-based genomic  
415 deletion analysis. *Journal of Clinical Microbiology*. 2002;40(7):2339-45.
- 416 25. Warren RM, Gey Van Pittius NC, Barnard M, Hesselting A, Engelke E, De Kock M, et al.  
417 Differentiation of *Mycobacterium tuberculosis* complex by PCR amplification of genomic regions of  
418 difference. *International Journal of Tuberculosis and Lung Disease*. 2006;10(7):818-22.
- 419 26. Elmonir W, Ramadan H. " Abattoir Based Prevalence, Economic Losses and Veterinarians'  
420 High-Risk Practices Survey of Bovine Tuberculosis in Mid-Delta of Egypt". *Alexandria Journal*  
421 *for Veterinary Sciences*. 2016;49(2).
- 422 27. Pérez-Morote R, Pontones-Rosa C, Gortázar-Schmidt C, Muñoz-Cardona ÁI. Quantifying  
423 the Economic Impact of Bovine Tuberculosis on Livestock Farms in South-Western Spain.  
424 *Animals*. 2020;10(12):2433.
- 425 28. Gathogo SM, Kuria JKN, Ombui JN. Prevalence of bovine tuberculosis in slaughter cattle  
426 in Kenya: a postmortem, microbiological and DNA molecular study. *Tropical animal health and*  
427 *production*. 2012;44(7):1739-44.
- 428 29. Nalapa DP, Muwonge A, Kankya C, Olea-Popelka F. Prevalence of tuberculous lesion in  
429 cattle slaughtered in Mubende district, Uganda. *BMC veterinary research*. 2017;13(1):73.
- 430 30. Katale BZ, Nonga HE, Kazwala RR. *The Changing Landscape of Bovine Tuberculosis in*  
431 *Tanzania. Tuberculosis in Animals: An African Perspective: Springer; 2019. p. 415-23.*
- 432 31. Mugambi J, Omwenga S, Wesonga H, Mbatha P, Gathogo S, Chota A, et al. Bovine  
433 Tuberculosis in East Africa. *African Crop Science Journal*. 2016;24(1):53-61.
- 434 32. Ibrahim S, Danbirni S, Abubakar U, Usman A, Saidu A, Abdulkadir A. Estimates of  
435 Mycobacterial Infections Based on Abattoir Surveillance in Two North-Eastern States of Nigeria.  
436 *Acta Scientific Microbiol*. 2018;1:60.
- 437 33. Ocepek M, Pate M, Žolnir-Dovč M, Poljak M. Transmission of *Mycobacterium tuberculosis*  
438 from human to cattle. *Journal of clinical microbiology*. 2005;43(7):3555-7.
- 439 34. Ameni G, Vordermeier M, Firdessa R, Aseffa A, Hewinson G, Gordon SV, et al.  
440 *Mycobacterium tuberculosis* infection in grazing cattle in central Ethiopia. *Veterinary journal*  
441 (London, England : 1997). 2011;188(3):359-61.
- 442 35. Regassa A, Medhin G, Ameni G. Bovine tuberculosis is more prevalent in cattle owned by  
443 farmers with active tuberculosis in central Ethiopia. *The Veterinary Journal*. 2008;178(1):119-25.
- 444 36. Bhembe NL, Jaja IF, Nwodo UU, Okoh AI, Green E. Prevalence of tuberculous  
445 lymphadenitis in slaughtered cattle in Eastern Cape, South Africa. *International Journal of*  
446 *Infectious Diseases*. 2017;61:27-37.
- 447 37. WHO. *Treatment of tuberculosis: guidelines: World Health Organization; 2010.*
- 448 38. Jain A, Mondal R. Extensively drug-resistant tuberculosis: current challenges and threats.  
449 *FEMS Immunology & Medical Microbiology*. 2008;53(2):145-50.



- 450 39. Ngabonziza J, Habimana Y, Decroo T, Migambi P, Dushime A, Mazarati J, et al. Reduction  
451 of diagnostic and treatment delays reduces rifampicin-resistant tuberculosis mortality in  
452 Rwanda. *The International Journal of Tuberculosis and Lung Disease*. 2020;24(3):329-39.
- 453 40. IFAD. Rwanda diary development project (RDDP). Detailed design report Kigali  
454 International Fund for Agricultural development; 2016 [updated 08 April 2020. 04 August 2016  
455 [Available from: [https://webapps.ifad.org/members/eb/118/docs/EB-2016-118-R-19-Project-  
456 design-report.pdf](https://webapps.ifad.org/members/eb/118/docs/EB-2016-118-R-19-Project-design-report.pdf).
- 457 41. Cadmus S, Akinseye VO, van Soolingen D. *Mycobacterium bovis* in humans and *M.*  
458 *tuberculosis* in animals in Nigeria: an overview from 1975–2014. *The International Journal of*  
459 *Tuberculosis and Lung Disease*. 2019;23(11):1162-70.
- 460 42. Marcotty T, Matthys F, Godfroid J, Rigouts L, Ameni G, Gey van Pittius N, et al. Zoonotic  
461 tuberculosis and brucellosis in Africa: neglected zoonoses or minor public-health issues? The  
462 outcomes of a multi-disciplinary workshop. *Annals of Tropical Medicine & Parasitology*.  
463 2009;103(5):401-11.
- 464 43. Oloya J, Opuda-Asibo J, Kazwala R, Demelash A, Skjerve E, Lund A, et al. Mycobacteria  
465 causing human cervical lymphadenitis in pastoral communities in the Karamoja region of  
466 Uganda. *Epidemiology & Infection*. 2008;136(5):636-43.
- 467 44. Mfinanga S, Morkve O, Kazwala R, Cleaveland S, Sharp M, Kunda J, et al. Mycobacterial  
468 adenitis: role of *Mycobacterium bovis*, non-tuberculous mycobacteria, HIV infection, and risk  
469 factors in Arusha, Tanzania. *East African Medical Journal*. 2004;81(4):171-8.
- 470 45. Lönnroth K, Raviglione M. The WHO's new End TB Strategy in the post-2015 era of the  
471 Sustainable Development Goals. *Transactions of the Royal Society of Tropical Medicine and*  
472 *Hygiene*. 2016;110(3):148-50.
- 473 46. Kazwala RR. Molecular epidemiology of bovine tuberculosis in Tanzania. 1996.
- 474 47. Primm TP, Lucero CA, Falkinham JO. Health impacts of environmental mycobacteria.  
475 *Clinical microbiology reviews*. 2004;17(1):98-106.
- 476 48. Gcebe N, Hlokwe TM. Non-tuberculous mycobacteria in South African wildlife: neglected  
477 pathogens and potential impediments for bovine tuberculosis diagnosis. *Frontiers in Cellular and*  
478 *Infection Microbiology*. 2017;7:15.
- 479 49. Ameni G, Aseffa A, Engers H, Young D, Gordon S, Hewinson G, et al. High prevalence  
480 and increased severity of pathology of bovine tuberculosis in Holsteins compared to zebu breeds  
481 under field cattle husbandry in central Ethiopia. *Clinical and Vaccine Immunology*.  
482 2007;14(10):1356-61.
- 483 50. Mackay CR, Hein WR. A large proportion of bovine T cells express the  $\gamma\delta$  T cell receptor  
484 and show a distinct tissue distribution and surface phenotype. *International Immunology*.  
485 1989;1(5):540-5.

## 486 **Supporting information**

487 Raw data. Excel file
